# Supplementary material for: Suppression of MUC1-Overexpressing Tumors by a Novel MUC1/CD3 Bispecific Antibody
Source: MDPI journal article supplement (doi:10.3390/antib12030047), 2023-07-13
Supplement: s1 [file s1]

## Supplementary data

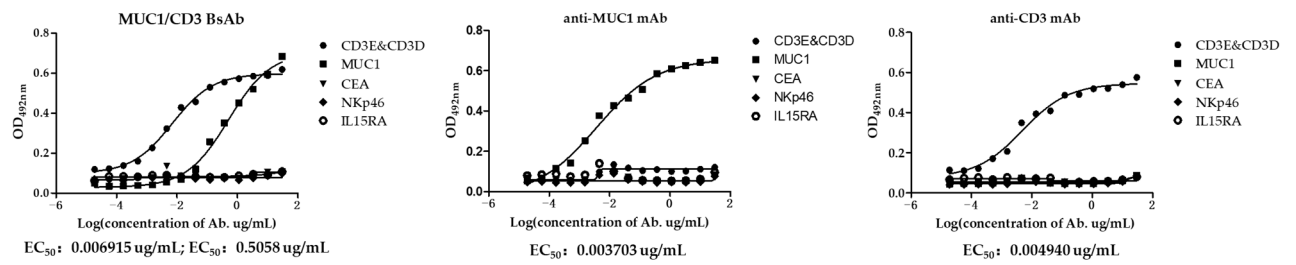

**Figure S1.** MUC1/CD3 BsAb specifically binds to CD3E&CD3D antigen and MUC1 antigen. Detection the binding of MUC1/CD3 BsAb, anti-MUC1 mAb, and anti-CD3 mAb to related antigens (CD3E&CD3D antigen and MUC1 antigen) and unrelated antigens (CEA, NKp46, and IL15RA) by ELISA. MUC1/CD3 BsAb can specifically bind to CD3E&CD3D antigen and MUC1 antigen as its parental anti-CD3 mAb and anti-MUC1 mAb, while MUC1 cannot bind to unrelated antigens (CEA, NKp46, and IL15RA).

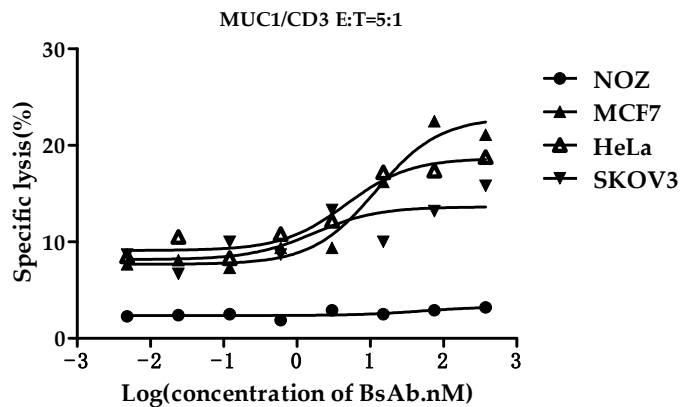

**Figure S2.** MUC1/CD3 BsAb induces T cell-mediated specific lysis of MUC1-expressing tumor cells. The cytotoxic assay was performed by flow cytometry. Tumor cells (MUC1-positive cells: HeLa, MCF7, and SKOV3; MUC1-negative cells: NOZ) were labeled with Cell Proliferation Dye eFluor™ 670 and incubated with human T cells (E/T ratio=5:1) in the presence of serially diluted BsAb at 37°C for 24h. After incubation, cells were collected and stained with 7-AAD solution. eFluor™ 670 and 7-AAD double-positive cells represent dead tumor cells. eFluor™ 670-positive and 7-AAD-negative cells represent live tumor cells. The gating strategy and raw data are listed below.

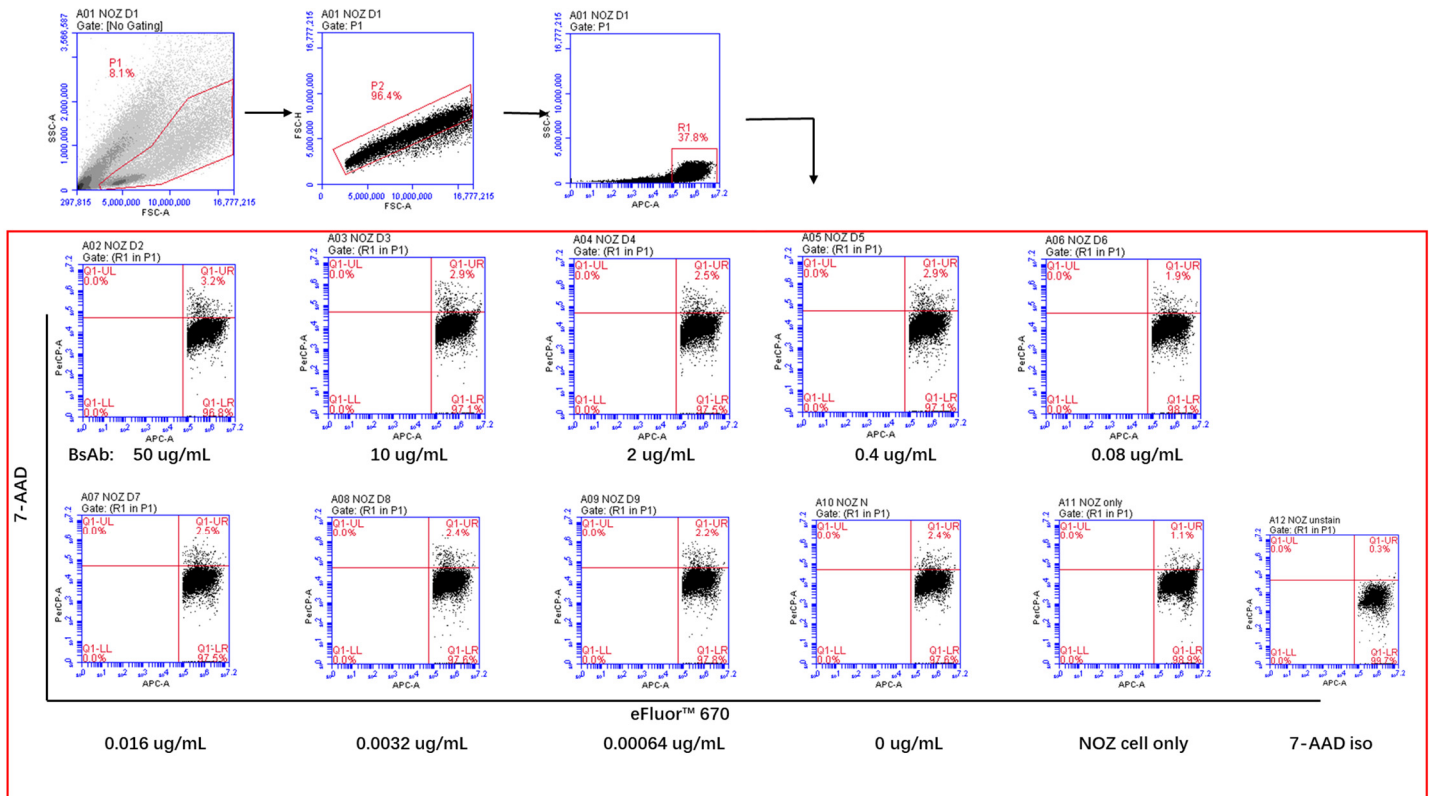

### Cytotoxic assay for NOZ cells by flow cytometry

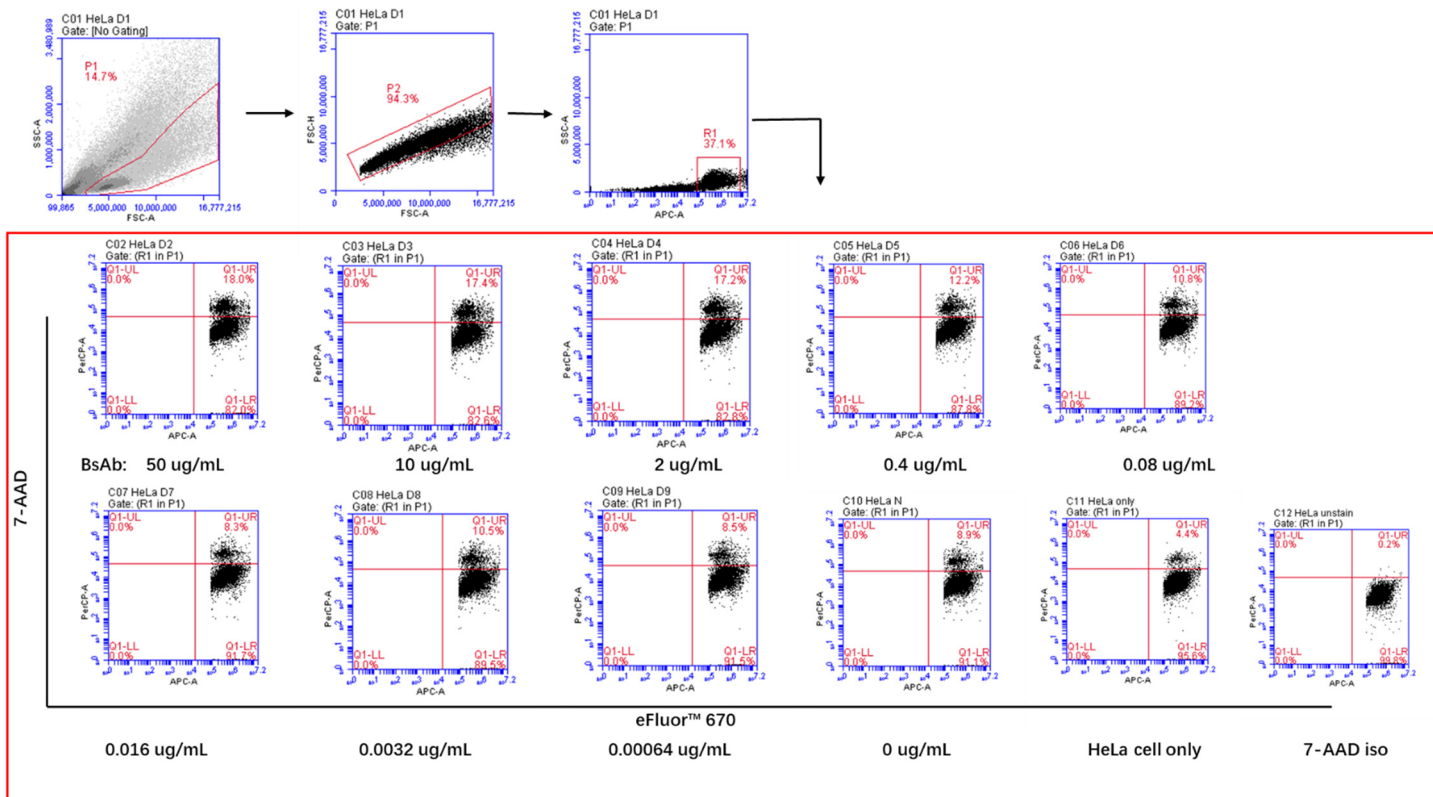

### Cytotoxic assay for HeLa cells by flow cytometry

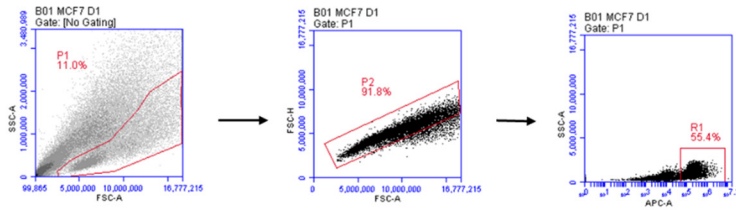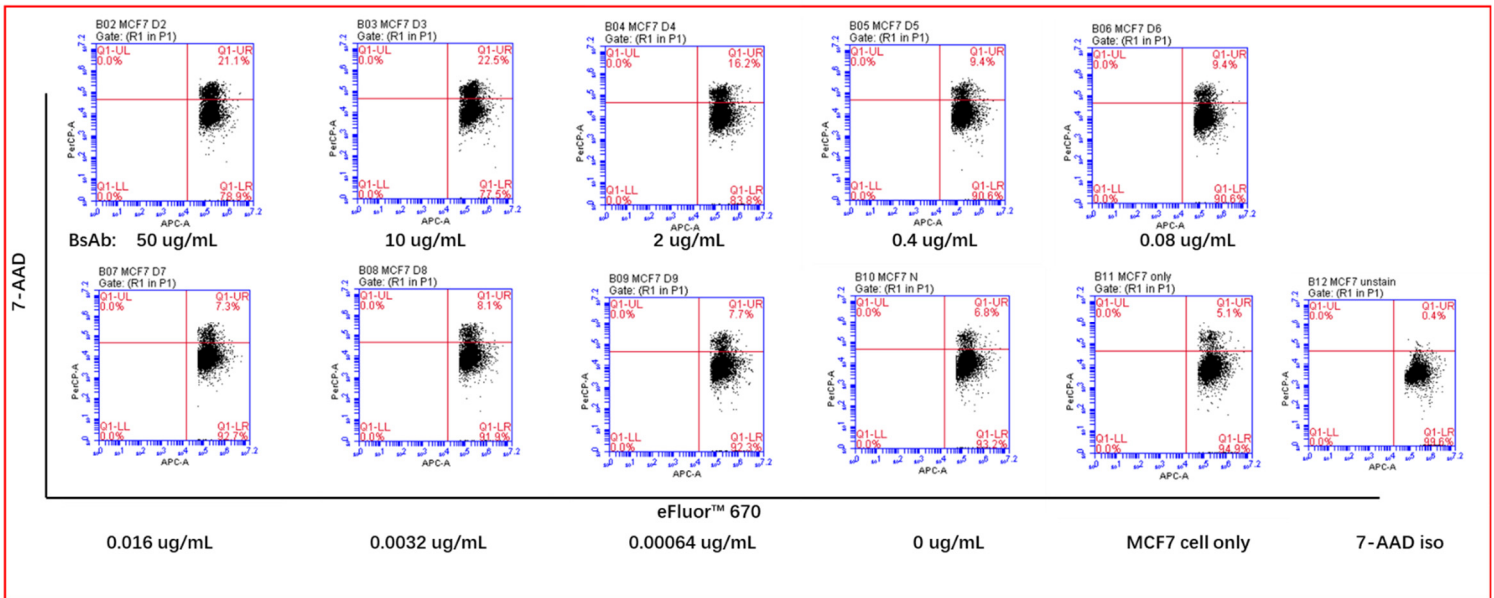

Cytotoxic assay for MCF7 cells by flow cytometry

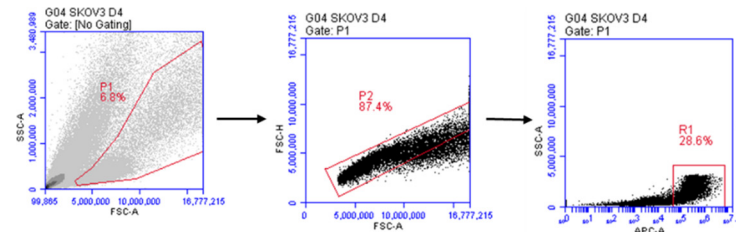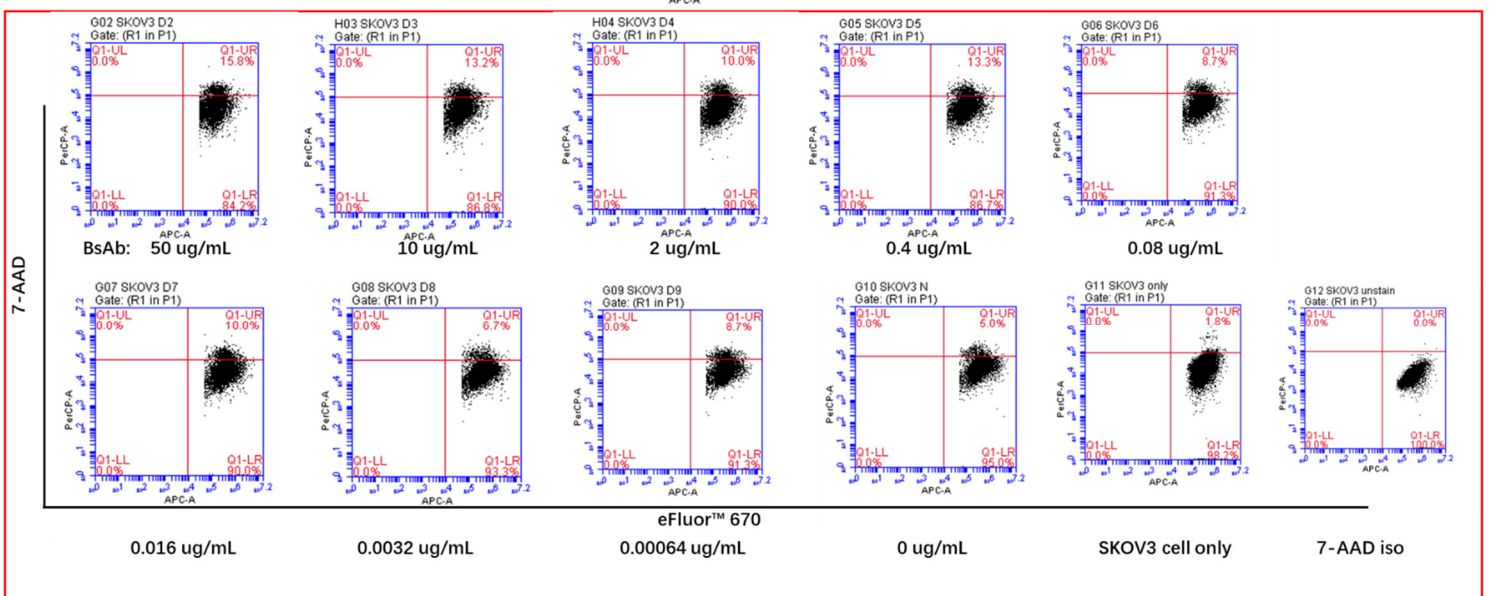

Cytotoxic assay for SKOV3 by flow cytometry

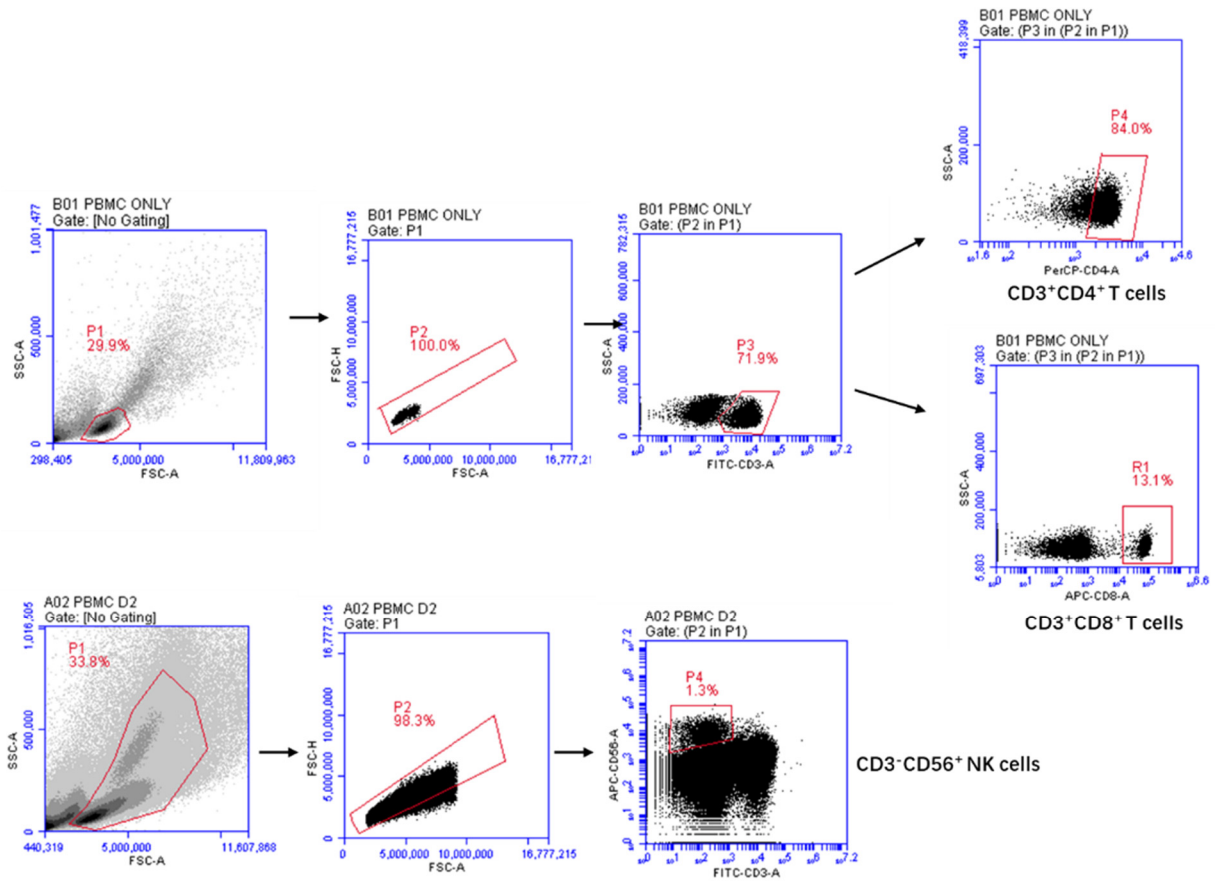

Gating strategy for CD3<sup>+</sup>CD4<sup>+</sup>T cells, CD3<sup>+</sup>CD8<sup>+</sup>T cells, and CD3<sup>-</sup>CD56<sup>+</sup>NK cells for the detection of CD25, CD69, and CD107a expression.

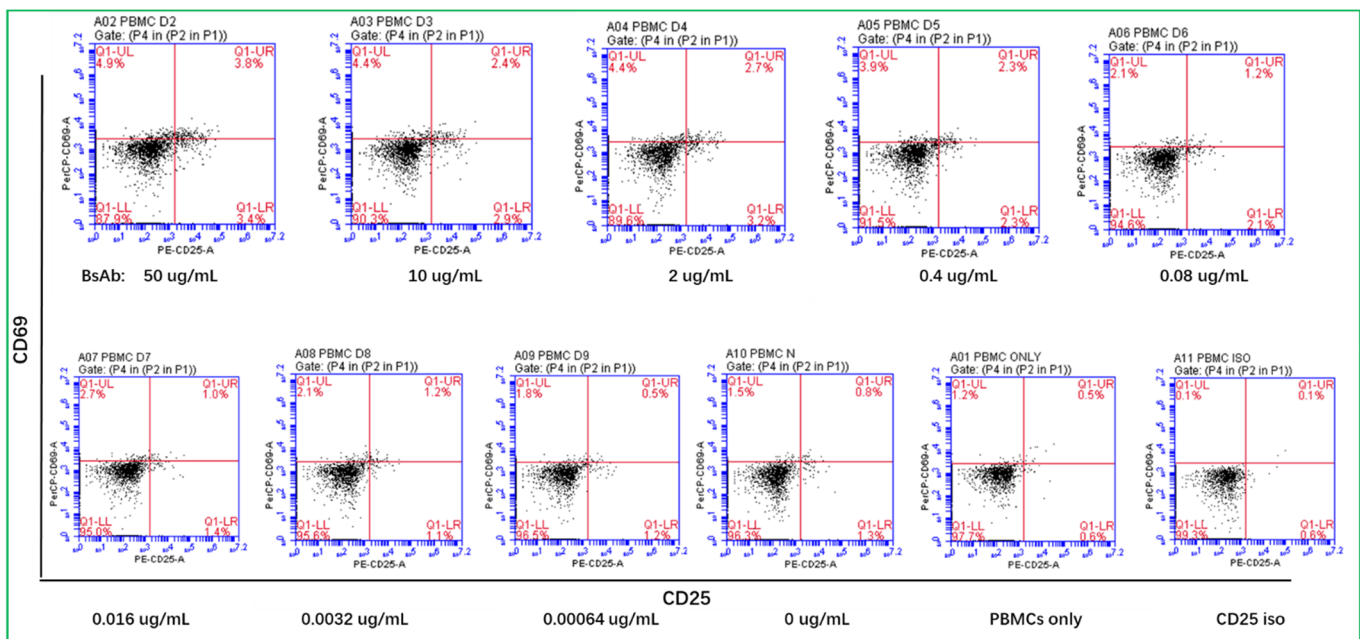

CD25 and CD69 expression on CD3<sup>-</sup>CD56<sup>+</sup>NK cells

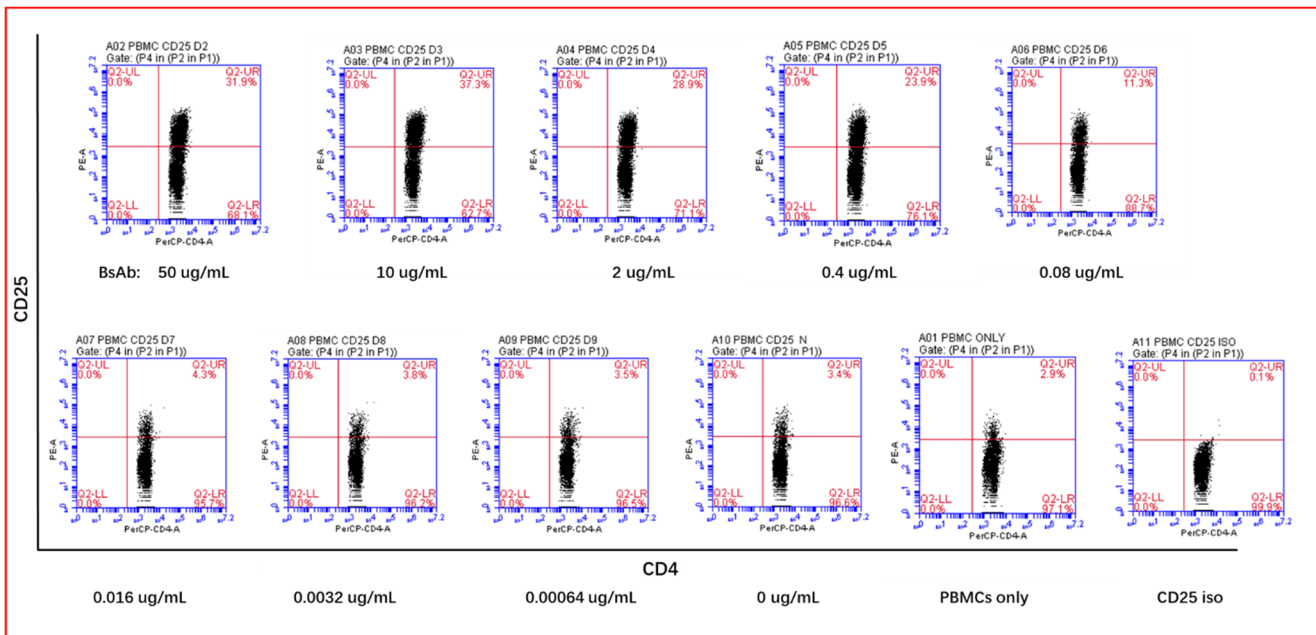

CD25 expression on CD4<sup>+</sup> T cells

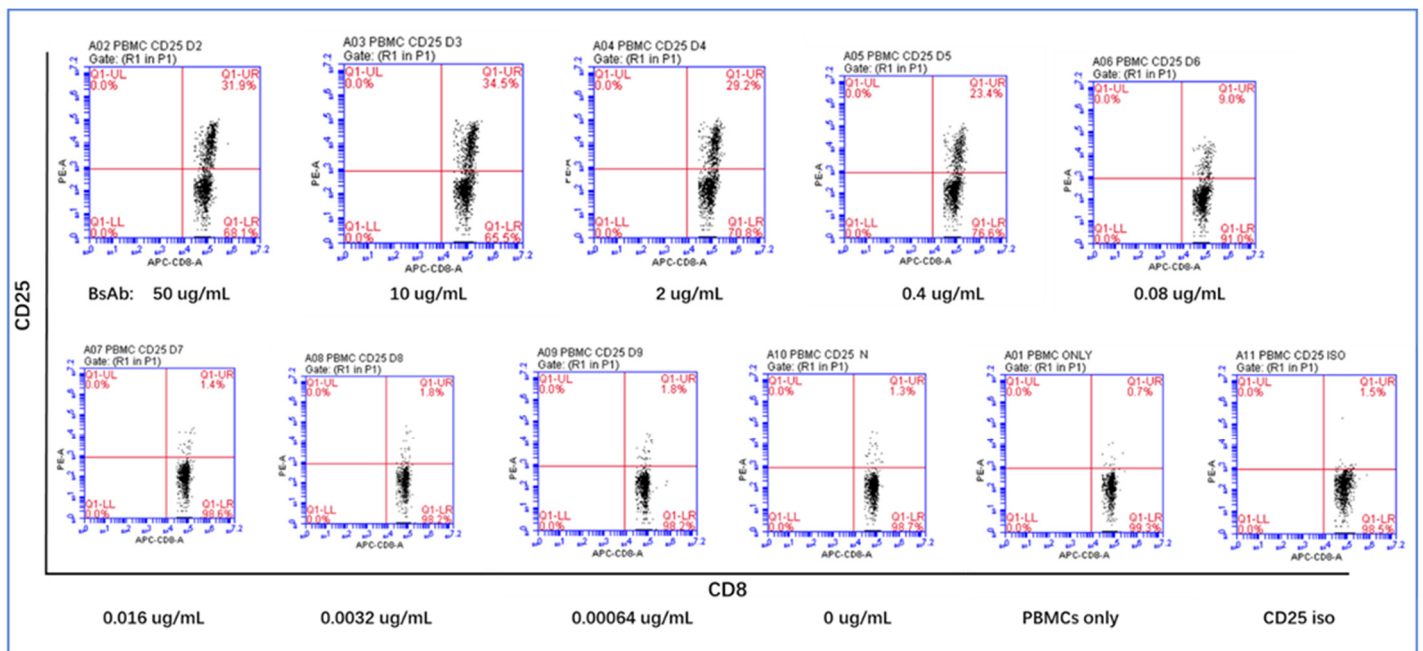

CD25 expression on CD8<sup>+</sup> T cells



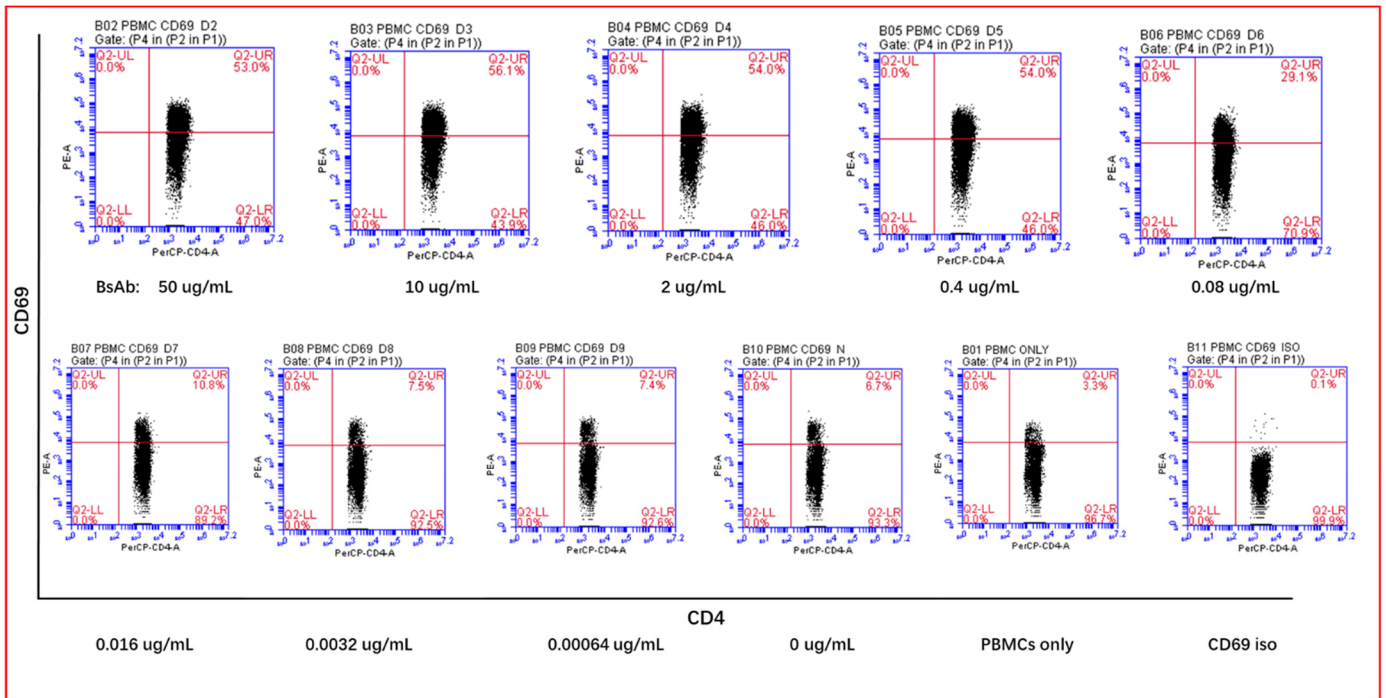

CD69 expression on CD4<sup>+</sup> T cells

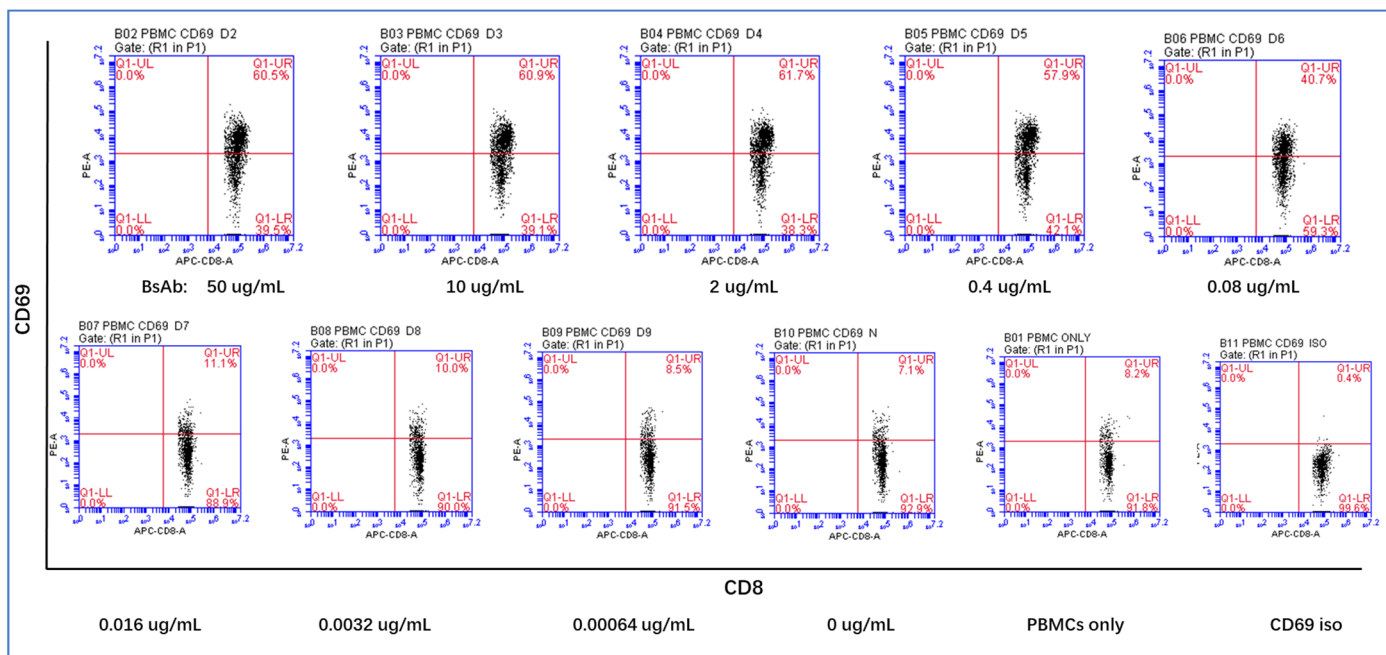

CD69 expression on CD8<sup>+</sup> T cells

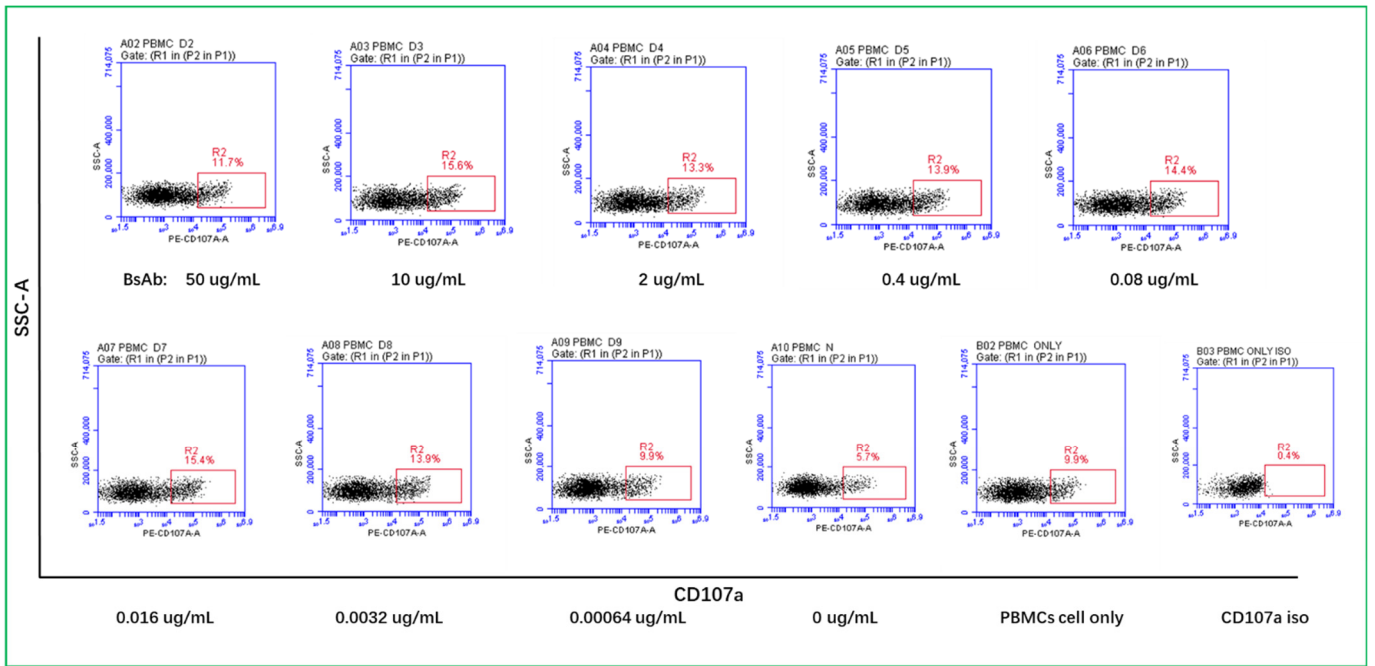

CD107a expression on CD3<sup>+</sup>CD56<sup>+</sup> NK cells

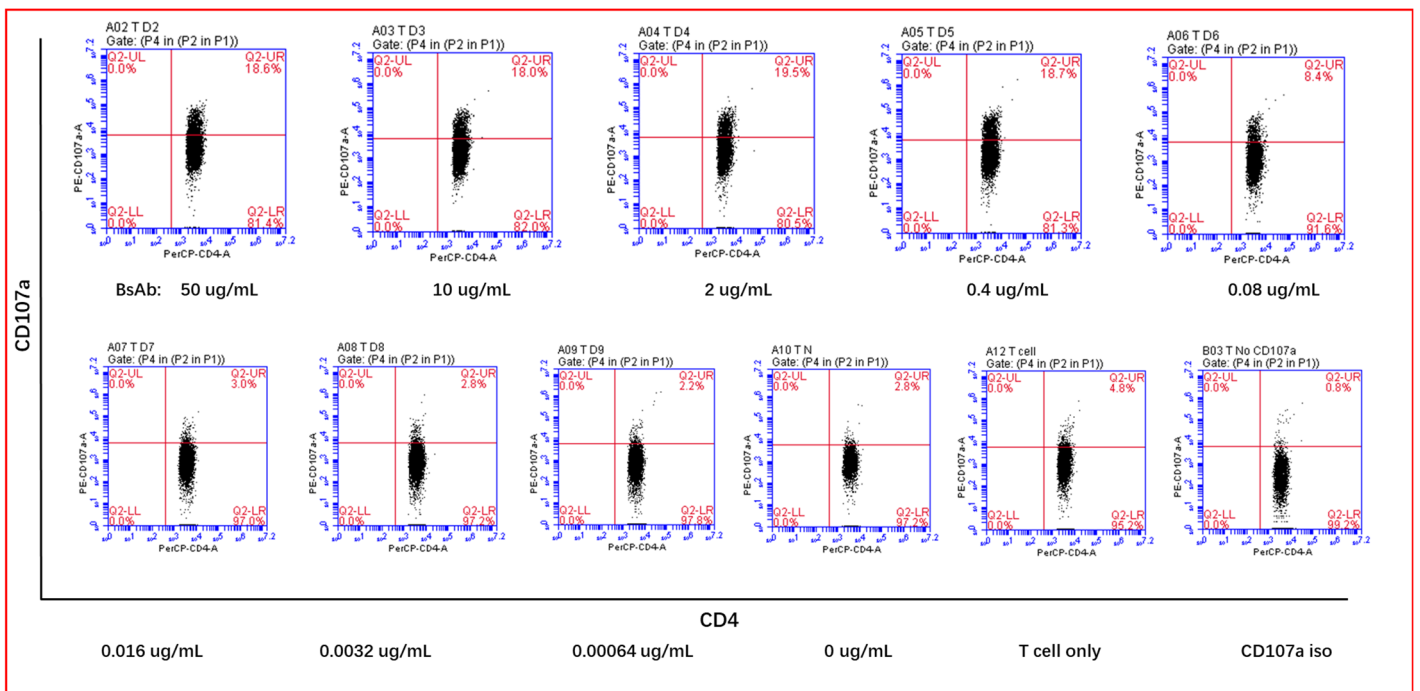

CD107a expression on CD4<sup>+</sup> T cells

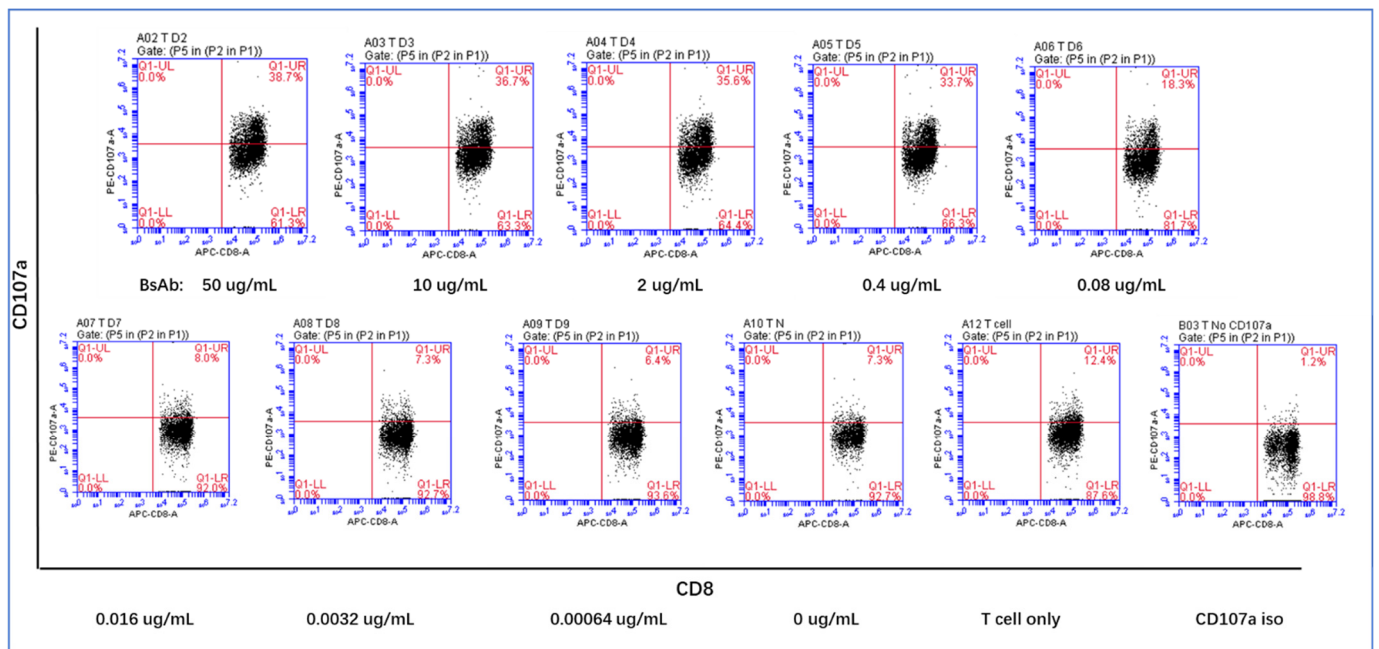

CD107a expression on CD8<sup>+</sup> T cells
